# Supplementary material
Source: PubMed Central journal article supplement (PMC3150271)
Supplement: NIHMS303134-supplement-1.pdf [file NIHMS303134-supplement-1.pdf]

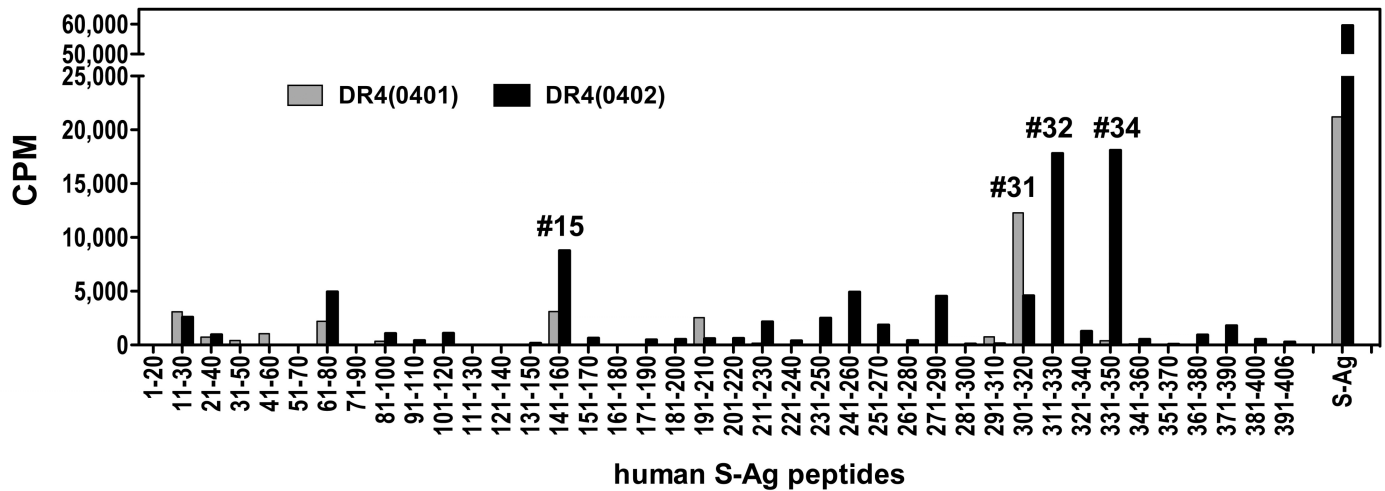

**Supplementary Figure 1.**

**Immunodominant epitope profiles of human S-Ag protein for HLA-DR4 alleles.** Spleen cells from S-Ag immunized mice were used in an in-vitro lymphocyte proliferation assay in the presence of  $25\mu\text{M}$  of each of 20 amino acid long overlapping synthetic 20mer peptides spanning the human S-Ag protein sequence, and whole S-Ag protein ( $20\mu\text{g/ml}$ ). [ $^3\text{H}$ ] Thymidine uptake by cells was plotted after subtracting the background counts in cells cultured in the absence of antigen (average background counts  $\leq 5000$  cpm). Data shown is the average (with standard deviation) of five individual mice for each strain.
