# Supplementary material
Source: PubMed Central journal article supplement (PMC3150271)
Supplement: NIHMS303134-supplement-2.pdf [file NIHMS303134-supplement-2.pdf]

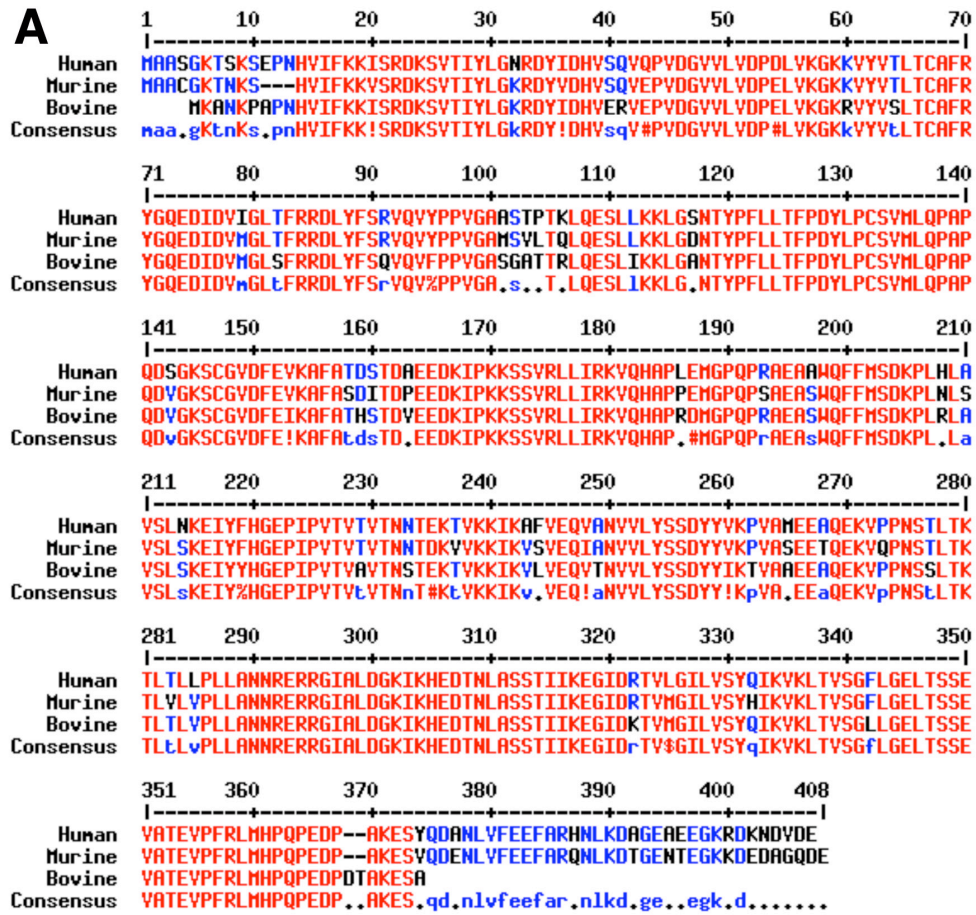

**B**

| SeqA | Name        | Length | SeqB | Name        | Length | Score |
|------|-------------|--------|------|-------------|--------|-------|
| 1    | Human-S-Ag  | 405    | 2    | Bovine-S-Ag | 370    | 85.0  |
| 1    | Human-S-Ag  | 405    | 3    | Murine-S-Ag | 403    | 86.0  |
| 2    | Bovine-S-Ag | 370    | 3    | Murine-S-Ag | 403    | 84.0  |

**Supplementary Figure 2:**

**Multiple sequence alignment of S-Antigen (retinal arrestin) protein.** Protein sequences of murine (NP\_033144), human (NP\_000532) and bovine (NP\_851343) species were aligned using (A) MultAlin program (<http://bioinfo.genopole-toulouse.prd.fr/multalin/multalin.html>). Amino acid residues in red color indicate highly conserved sequences, in blue indicate sequences with consensus and in black indicate variations from consensus. (B) Percentage of homology (given as Score) between the three different sequences as calculated by ClustalW tool (<http://www.ebi.ac.uk/Tools/clustalw2/index.html>).
